# Supplementary material
Source: PubMed Central journal article supplement (PMC5987274)
Supplement: supplementary_material(3).pdf [file supplementary_material%283%29.pdf]

## A. PERSONAL PROFILE

### 1. Demographics (please fill in the blank spots; you may choose more than one option)

- a. Age \_\_\_\_\_ years
- b. Country \_\_\_\_\_
- c. Background  Gastroenterologist  Surgeon  Other: \_\_\_\_\_
- d. Working place  Academic Center  Tertiary Hospital  Regional Hospital
- e. Current situation  Trainee  Fully trained

### 2. Exposure to endoscopic interventions and learning methods in endoscopy

#### a. Endoscopic experience

I. For how many years do you perform endoscopy: \_\_\_\_\_ years

II. How many endoscopic procedures have you performed

*Choose one option for cases over the last year and one option for total number of cases*

| Colonoscopy                                          |                            |                                |                                  |                                  |                                  |                               |
|------------------------------------------------------|----------------------------|--------------------------------|----------------------------------|----------------------------------|----------------------------------|-------------------------------|
| Cases per year:                                      | <input type="checkbox"/> 0 | <input type="checkbox"/> 1-100 | <input type="checkbox"/> 101-200 | <input type="checkbox"/> >200    |                                  |                               |
| Total cases:                                         | <input type="checkbox"/> 0 | <input type="checkbox"/> 1-100 | <input type="checkbox"/> 101-200 | <input type="checkbox"/> 201-400 | <input type="checkbox"/> 401-600 | <input type="checkbox"/> >600 |
| Upper Endoscopy                                      |                            |                                |                                  |                                  |                                  |                               |
| Cases per year:                                      | <input type="checkbox"/> 0 | <input type="checkbox"/> 1-100 | <input type="checkbox"/> 101-200 | <input type="checkbox"/> >200    |                                  |                               |
| Total cases:                                         | <input type="checkbox"/> 0 | <input type="checkbox"/> 1-100 | <input type="checkbox"/> 101-200 | <input type="checkbox"/> 201-400 | <input type="checkbox"/> 401-600 | <input type="checkbox"/> >600 |
| Endoscopic Retrograde Colangiopancreatography (ERCP) |                            |                                |                                  |                                  |                                  |                               |
| Cases per year:                                      | <input type="checkbox"/> 0 | <input type="checkbox"/> 1-100 | <input type="checkbox"/> 101-200 | <input type="checkbox"/> >200    |                                  |                               |
| Total cases:                                         | <input type="checkbox"/> 0 | <input type="checkbox"/> 1-100 | <input type="checkbox"/> 101-200 | <input type="checkbox"/> 201-400 | <input type="checkbox"/> 401-600 | <input type="checkbox"/> >600 |
| Endoscopic Ultrasonography (EUS)                     |                            |                                |                                  |                                  |                                  |                               |
| Cases per year:                                      | <input type="checkbox"/> 0 | <input type="checkbox"/> 1-100 | <input type="checkbox"/> 101-200 | <input type="checkbox"/> >200    |                                  |                               |
| Total cases:                                         | <input type="checkbox"/> 0 | <input type="checkbox"/> 1-100 | <input type="checkbox"/> 101-200 | <input type="checkbox"/> 201-400 | <input type="checkbox"/> 401-600 | <input type="checkbox"/> >600 |
| Endoscopic Mucosal Resection (EMR)                   |                            |                                |                                  |                                  |                                  |                               |
| - Esophagus                                          |                            |                                |                                  |                                  |                                  |                               |
| Cases per year:                                      | <input type="checkbox"/> 0 | <input type="checkbox"/> 1-20  | <input type="checkbox"/> 21-50   | <input type="checkbox"/> >50     |                                  |                               |
| Total cases:                                         | <input type="checkbox"/> 0 | <input type="checkbox"/> 1-20  | <input type="checkbox"/> 21-50   | <input type="checkbox"/> 51-100  | <input type="checkbox"/> 101-200 | <input type="checkbox"/> >200 |
| - Stomach                                            |                            |                                |                                  |                                  |                                  |                               |
| Cases per year:                                      | <input type="checkbox"/> 0 | <input type="checkbox"/> 1-20  | <input type="checkbox"/> 21-50   | <input type="checkbox"/> >50     |                                  |                               |
| Total cases:                                         | <input type="checkbox"/> 0 | <input type="checkbox"/> 1-20  | <input type="checkbox"/> 21-50   | <input type="checkbox"/> 51-100  | <input type="checkbox"/> 101-200 | <input type="checkbox"/> >200 |
| - Colon                                              |                            |                                |                                  |                                  |                                  |                               |
| Cases per year:                                      | <input type="checkbox"/> 0 | <input type="checkbox"/> 1-20  | <input type="checkbox"/> 21-50   | <input type="checkbox"/> >50     |                                  |                               |
| Total cases:                                         | <input type="checkbox"/> 0 | <input type="checkbox"/> 1-20  | <input type="checkbox"/> 21-50   | <input type="checkbox"/> 51-100  | <input type="checkbox"/> 101-200 | <input type="checkbox"/> >200 |

- Have you ever used one of these techniques

|                  |                              |                             |
|------------------|------------------------------|-----------------------------|
| Inject and snare | <input type="checkbox"/> Yes | <input type="checkbox"/> No |
| Band and snare   | <input type="checkbox"/> Yes | <input type="checkbox"/> No |
| Cap and snare    | <input type="checkbox"/> Yes | <input type="checkbox"/> No |

**Endoscopic Submucosal Dissection (ESD)**

|                 |                            |                               |                                |                                 |                                  |                               |
|-----------------|----------------------------|-------------------------------|--------------------------------|---------------------------------|----------------------------------|-------------------------------|
| Cases per year: | <input type="checkbox"/> 0 | <input type="checkbox"/> 1-20 | <input type="checkbox"/> 21-50 | <input type="checkbox"/> >50    |                                  |                               |
| Total cases:    | <input type="checkbox"/> 0 | <input type="checkbox"/> 1-20 | <input type="checkbox"/> 21-50 | <input type="checkbox"/> 51-100 | <input type="checkbox"/> 101-200 | <input type="checkbox"/> >200 |

***b. Simulator familiarity***

I. Have you ever attended any of the following courses?

Courses with computerized /virtual – reality simulators

(Symbionix GI-Bronch Mentor / CAE Healthcare AccuTouch / Olympus Endo TS-1 / GI mentor)

Yes       No

How many \_\_\_\_\_

Courses with composite and explanted animal organs simulators-ex vivo animal model

(Erlanger Endo-Trainer (EASIE)/ Erlanger compactEASIE / Endo X trainer)

Yes       No

How many \_\_\_\_\_

Courses using live animals models

Yes       No

How many \_\_\_\_\_

## B. ADEQUACY AND REALISM OF THE ANIMAL MODEL IN “SIMULATING” THE VARIOUS ASPECTS OF THE PROCEDURES

### 1. Realism compared to human

#### a. Rate the following items regarding the live animal simulated procedures compared with the human practice

I. Please circle the number that best describes your opinion.

For questions that may not apply choose the option “N/A” (not applicable).

From 1=very unrealistic to 10=very realistic

|                                                              |   |   |   |   |   |   |   |   |   |    |    |
|--------------------------------------------------------------|---|---|---|---|---|---|---|---|---|----|----|
| Overall appearance                                           | 1 | 2 | 3 | 4 | 5 | 6 | 7 | 8 | 9 | 10 | NA |
| Overall difficulty                                           | 1 | 2 | 3 | 4 | 5 | 6 | 7 | 8 | 9 | 10 | NA |
| Anatomy                                                      | 1 | 2 | 3 | 4 | 5 | 6 | 7 | 8 | 9 | 10 | NA |
| Size of organ                                                | 1 | 2 | 3 | 4 | 5 | 6 | 7 | 8 | 9 | 10 | NA |
| Wall structure of organ                                      | 1 | 2 | 3 | 4 | 5 | 6 | 7 | 8 | 9 | 10 | NA |
| Mucosal thickness                                            | 1 | 2 | 3 | 4 | 5 | 6 | 7 | 8 | 9 | 10 | NA |
| Tissue pliability/elasticity                                 | 1 | 2 | 3 | 4 | 5 | 6 | 7 | 8 | 9 | 10 | NA |
| Tactile feedback                                             | 1 | 2 | 3 | 4 | 5 | 6 | 7 | 8 | 9 | 10 | NA |
| Overall EMR experience using multiband mucosectomy technique | 1 | 2 | 3 | 4 | 5 | 6 | 7 | 8 | 9 | 10 | NA |
| Esophageal EMR using multiband mucosectomy technique         |   |   |   |   |   |   |   |   |   |    |    |
| Ability to inspect the esophagus                             | 1 | 2 | 3 | 4 | 5 | 6 | 7 | 8 | 9 | 10 | NA |
| Ability to mark the outer margins of pseudolesion            | 1 | 2 | 3 | 4 | 5 | 6 | 7 | 8 | 9 | 10 | NA |
| Ability to apply band ligation                               | 1 | 2 | 3 | 4 | 5 | 6 | 7 | 8 | 9 | 10 | NA |
| Ability to cut the created pseudopolyp                       | 1 | 2 | 3 | 4 | 5 | 6 | 7 | 8 | 9 | 10 | NA |
| Ability to inspect the ulcer                                 | 1 | 2 | 3 | 4 | 5 | 6 | 7 | 8 | 9 | 10 | NA |
| Overall ESD experience                                       | 1 | 2 | 3 | 4 | 5 | 6 | 7 | 8 | 9 | 10 | NA |
| Overall esophageal ESD experience                            | 1 | 2 | 3 | 4 | 5 | 6 | 7 | 8 | 9 | 10 | NA |
| Esophageal ESD                                               |   |   |   |   |   |   |   |   |   |    |    |
| Ability to inspect the esophagus                             | 1 | 2 | 3 | 4 | 5 | 6 | 7 | 8 | 9 | 10 | NA |
| Ability to mark the outer margins of pseudo lesion           | 1 | 2 | 3 | 4 | 5 | 6 | 7 | 8 | 9 | 10 | NA |
| Ability to inject and perform circumferential incision       | 1 | 2 | 3 | 4 | 5 | 6 | 7 | 8 | 9 | 10 | NA |
| Ability to inject to lift the pseudolesion                   | 1 | 2 | 3 | 4 | 5 | 6 | 7 | 8 | 9 | 10 | NA |
| Ability to perform submucosal dissection                     | 1 | 2 | 3 | 4 | 5 | 6 | 7 | 8 | 9 | 10 | NA |
| Ability to inspect the ulcer                                 | 1 | 2 | 3 | 4 | 5 | 6 | 7 | 8 | 9 | 10 | NA |
| Overall gastric ESD experience                               | 1 | 2 | 3 | 4 | 5 | 6 | 7 | 8 | 9 | 10 | NA |
| Gastric ESD                                                  |   |   |   |   |   |   |   |   |   |    |    |
| Ability to inspect the stomach                               | 1 | 2 | 3 | 4 | 5 | 6 | 7 | 8 | 9 | 10 | NA |
| Ability to mark the outer margins of pseudo lesion           | 1 | 2 | 3 | 4 | 5 | 6 | 7 | 8 | 9 | 10 | NA |
| Ability to inject and perform circumferential incision       | 1 | 2 | 3 | 4 | 5 | 6 | 7 | 8 | 9 | 10 | NA |
| Ability to inject to lift the pseudolesion                   | 1 | 2 | 3 | 4 | 5 | 6 | 7 | 8 | 9 | 10 | NA |
| Ability to perform submucosal dissection                     | 1 | 2 | 3 | 4 | 5 | 6 | 7 | 8 | 9 | 10 | NA |
| Ability to inspect the ulcer                                 | 1 | 2 | 3 | 4 | 5 | 6 | 7 | 8 | 9 | 10 | NA |

Complications (*answer only in case of complication occurrence during the workshop*)

|                                   |   |   |   |   |   |   |   |   |   |    |    |
|-----------------------------------|---|---|---|---|---|---|---|---|---|----|----|
| Overall complication detection    | 1 | 2 | 3 | 4 | 5 | 6 | 7 | 8 | 9 | 10 | NA |
| Complication detection            |   |   |   |   |   |   |   |   |   |    |    |
| Ability to detect bleedings       | 1 | 2 | 3 | 4 | 5 | 6 | 7 | 8 | 9 | 10 | NA |
| In the esophagus                  | 1 | 2 | 3 | 4 | 5 | 6 | 7 | 8 | 9 | 10 | NA |
| In the stomach                    | 1 | 2 | 3 | 4 | 5 | 6 | 7 | 8 | 9 | 10 | NA |
| Ability to detect perforations    | 1 | 2 | 3 | 4 | 5 | 6 | 7 | 8 | 9 | 10 | NA |
| In the esophagus                  | 1 | 2 | 3 | 4 | 5 | 6 | 7 | 8 | 9 | 10 | NA |
| In the stomach                    | 1 | 2 | 3 | 4 | 5 | 6 | 7 | 8 | 9 | 10 | NA |
| Overall complication management   | 1 | 2 | 3 | 4 | 5 | 6 | 7 | 8 | 9 | 10 | NA |
| Complication management           |   |   |   |   |   |   |   |   |   |    |    |
| Ability to deal with bleedings    | 1 | 2 | 3 | 4 | 5 | 6 | 7 | 8 | 9 | 10 | NA |
| In the esophagus                  | 1 | 2 | 3 | 4 | 5 | 6 | 7 | 8 | 9 | 10 | NA |
| In the stomach                    | 1 | 2 | 3 | 4 | 5 | 6 | 7 | 8 | 9 | 10 | NA |
| Ability to deal with perforations | 1 | 2 | 3 | 4 | 5 | 6 | 7 | 8 | 9 | 10 | NA |
| In the esophagus                  | 1 | 2 | 3 | 4 | 5 | 6 | 7 | 8 | 9 | 10 | NA |
| In the stomach                    | 1 | 2 | 3 | 4 | 5 | 6 | 7 | 8 | 9 | 10 | NA |

## C. APPRECIATION OF THE ANIMAL MODEL AS A LEARNING TOOL

### 1. Usefulness as an instructional tool

I. Please circle the number that best describes your opinion.

For questions that may not apply choose the option "N/A" (not applicable).

*From 1=totally don't understand to 10=totally understand*

After performing live animal simulated procedures, I am capable of understanding how they are performed and understanding the coordination of tasks, namely:

|                                                      |   |   |   |   |   |   |   |   |   |    |    |
|------------------------------------------------------|---|---|---|---|---|---|---|---|---|----|----|
| Esophageal EMR using multiband mucosectomy technique | 1 | 2 | 3 | 4 | 5 | 6 | 7 | 8 | 9 | 10 | NA |
| Esophageal ESD                                       | 1 | 2 | 3 | 4 | 5 | 6 | 7 | 8 | 9 | 10 | NA |
| Gastric ESD                                          | 1 | 2 | 3 | 4 | 5 | 6 | 7 | 8 | 9 | 10 | NA |
| Complication detection and management                | 1 | 2 | 3 | 4 | 5 | 6 | 7 | 8 | 9 | 10 | NA |

*From 1=very difficult to 10=very easy*

After performing live animal simulated procedures, how would you grade their execution, namely:

|                                                      |   |   |   |   |   |   |   |   |   |    |    |
|------------------------------------------------------|---|---|---|---|---|---|---|---|---|----|----|
| Esophageal EMR using multiband mucosectomy technique | 1 | 2 | 3 | 4 | 5 | 6 | 7 | 8 | 9 | 10 | NA |
| Esophageal ESD                                       | 1 | 2 | 3 | 4 | 5 | 6 | 7 | 8 | 9 | 10 | NA |
| Gastric ESD                                          | 1 | 2 | 3 | 4 | 5 | 6 | 7 | 8 | 9 | 10 | NA |
| Complication detection and management                | 1 | 2 | 3 | 4 | 5 | 6 | 7 | 8 | 9 | 10 | NA |

*From 1=very useless to 10=very useful*

For beginners, how would you grade the usefulness of live animal simulated procedures, in supplementing clinical:

|                                                      |   |   |   |   |   |   |   |   |   |    |    |
|------------------------------------------------------|---|---|---|---|---|---|---|---|---|----|----|
| Esophageal EMR using multiband mucosectomy technique | 1 | 2 | 3 | 4 | 5 | 6 | 7 | 8 | 9 | 10 | NA |
| Esophageal ESD                                       | 1 | 2 | 3 | 4 | 5 | 6 | 7 | 8 | 9 | 10 | NA |
| Gastric ESD                                          | 1 | 2 | 3 | 4 | 5 | 6 | 7 | 8 | 9 | 10 | NA |
| Complication detection and management                | 1 | 2 | 3 | 4 | 5 | 6 | 7 | 8 | 9 | 10 | NA |

## 2. Application in training programs

I. Please circle the number that best describes your opinion.

For questions that may not apply choose the option "N/A" (not applicable).

*From 1=very negatively to 10=very positively*

For endoscopists, how do you think live animal simulated procedures, prepare them to perform live cases namely:

|                                                      |   |   |   |   |   |   |   |   |   |    |    |
|------------------------------------------------------|---|---|---|---|---|---|---|---|---|----|----|
| Esophageal EMR using multiband mucosectomy technique | 1 | 2 | 3 | 4 | 5 | 6 | 7 | 8 | 9 | 10 | NA |
| Esophageal ESD                                       | 1 | 2 | 3 | 4 | 5 | 6 | 7 | 8 | 9 | 10 | NA |
| Gastric ESD                                          | 1 | 2 | 3 | 4 | 5 | 6 | 7 | 8 | 9 | 10 | NA |
| Complication detection and management                | 1 | 2 | 3 | 4 | 5 | 6 | 7 | 8 | 9 | 10 | NA |

*From 1=strongly disagree to 10=strongly agree*

Should a course like this be a prerequisite in order to be allowed to practice these procedures, namely:

|                                                      |   |   |   |   |   |   |   |   |   |    |    |
|------------------------------------------------------|---|---|---|---|---|---|---|---|---|----|----|
| Esophageal EMR using multiband mucosectomy technique | 1 | 2 | 3 | 4 | 5 | 6 | 7 | 8 | 9 | 10 | NA |
| Esophageal ESD                                       | 1 | 2 | 3 | 4 | 5 | 6 | 7 | 8 | 9 | 10 | NA |
| Gastric ESD                                          | 1 | 2 | 3 | 4 | 5 | 6 | 7 | 8 | 9 | 10 | NA |
| Complication detection and management                | 1 | 2 | 3 | 4 | 5 | 6 | 7 | 8 | 9 | 10 | NA |

*From 1=totally non confident 10=totally confident*

|                                                                                                                                                         |   |   |   |   |   |   |   |   |   |    |    |
|---------------------------------------------------------------------------------------------------------------------------------------------------------|---|---|---|---|---|---|---|---|---|----|----|
| How confident would you be in <u>recommending</u> live animal simulated procedures to <u>colleagues</u> who are performing or learning to perform them? | 1 | 2 | 3 | 4 | 5 | 6 | 7 | 8 | 9 | 10 | NA |
|---------------------------------------------------------------------------------------------------------------------------------------------------------|---|---|---|---|---|---|---|---|---|----|----|

*From 1=absolutely no 10= absolutely yes*

|                                                                                |   |   |   |   |   |   |   |   |   |    |    |
|--------------------------------------------------------------------------------|---|---|---|---|---|---|---|---|---|----|----|
| Would you be willing to undergo <u>further live</u> animal simulator training? | 1 | 2 | 3 | 4 | 5 | 6 | 7 | 8 | 9 | 10 | NA |
|--------------------------------------------------------------------------------|---|---|---|---|---|---|---|---|---|----|----|

*From 1=very unlikely to 10=very likely*

|                                                                                        |   |   |   |   |   |   |   |   |   |    |    |
|----------------------------------------------------------------------------------------|---|---|---|---|---|---|---|---|---|----|----|
| What would be the possibility of <u>organizing such a</u> course in your home country? | 1 | 2 | 3 | 4 | 5 | 6 | 7 | 8 | 9 | 10 | NA |
|----------------------------------------------------------------------------------------|---|---|---|---|---|---|---|---|---|----|----|

*From 1=strongly disagree to 10=strongly agree*

|                                                                                                    |   |   |   |   |   |   |   |   |   |    |    |
|----------------------------------------------------------------------------------------------------|---|---|---|---|---|---|---|---|---|----|----|
| Do you think this course represented an <u>useful</u> <u>experience</u> in your clinical practice? | 1 | 2 | 3 | 4 | 5 | 6 | 7 | 8 | 9 | 10 | NA |
|----------------------------------------------------------------------------------------------------|---|---|---|---|---|---|---|---|---|----|----|

Thank you very much for your collaboration.
